# Supplementary material for: The physiological response of Ectomycorrhizal fungus Lepista sordida to Cd and Cu stress
Source: PubMed Central journal article supplement (PMC8054734; doi:10.7717/peerj.11115), 2021-04-16
Supplement: peerj-09-11115-s001.pdf [file peerj-09-11115-s001.pdf]

[BLAST®](#) » [blastn suite](#) » RID-EGABFX59016

### BLAST Results

[Questions/comments](#)

**Job title: Z864-HLXM**

**RID** [EGABFX59016](#) (Expires on 06-17 10:07 am)

**Query ID** Icl|Query\_49443  
**Description** None  
**Molecule type** dna  
**Query Length** 643

**Database Name** nt  
**Description** Nucleotide collection (nt)  
**Program** BLASTN 2.10.1+

### Graphic Summary

**Distribution of the top 100 Blast Hits on 100 subject sequences**

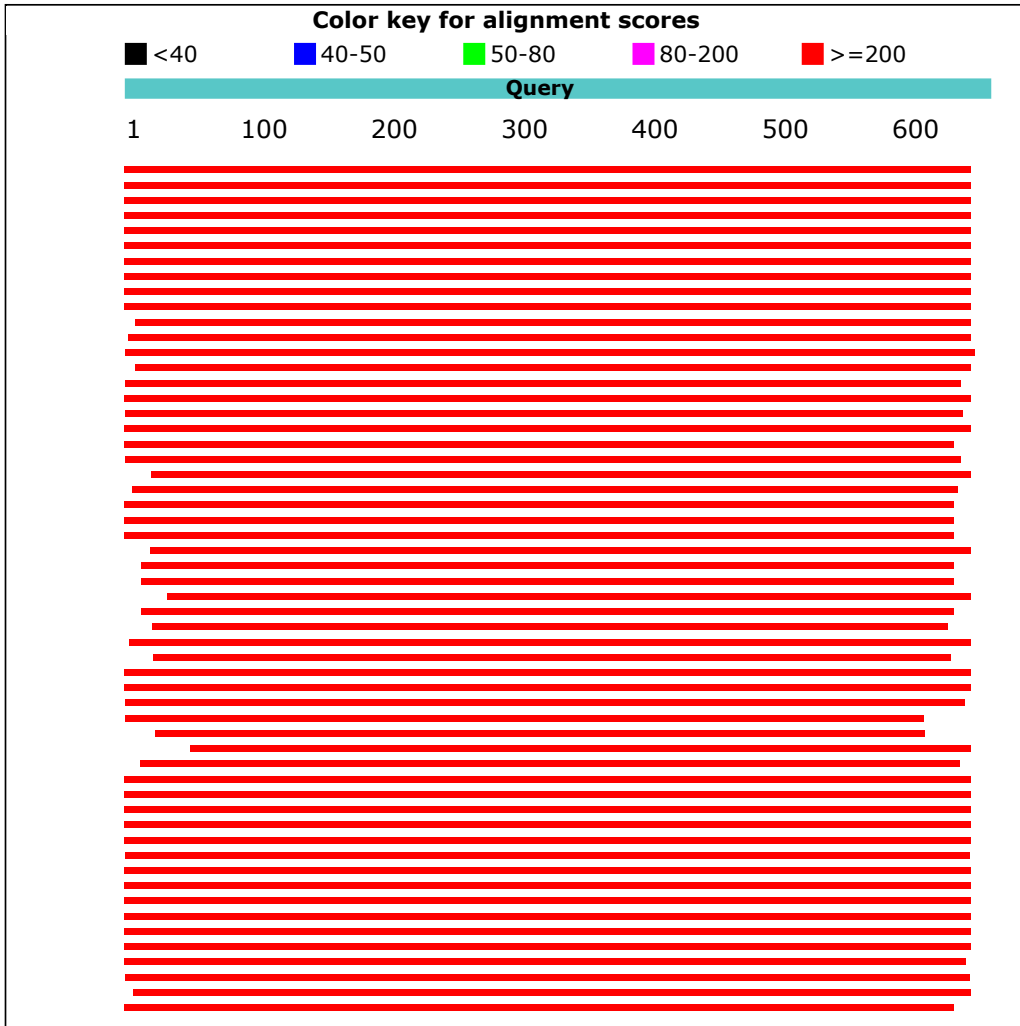

## Descriptions

Sequences producing significant alignments:

| Description                                                                                                                                                                                                                                              | Max Score | Total Score | Query Cover | E value | Per. Ident | Accession                  |
|----------------------------------------------------------------------------------------------------------------------------------------------------------------------------------------------------------------------------------------------------------|-----------|-------------|-------------|---------|------------|----------------------------|
| Lepista sordida culture-collection MFLUCC:13-0898 18S ribosomal RNA gene, partial sequence; internal transcribed spacer 1, 5.8S ribosomal RNA gene, and internal transcribed spacer 2, complete sequence; and 28S ribosomal RNA gene, partial sequence   | 1173      | 1173        | 99%         | 0.0     | 99.69%     | <a href="#">KU877531.1</a> |
| Lepista sordida culture-collection MFLUCC:14-0769 18S ribosomal RNA gene, partial sequence; internal transcribed spacer 1, 5.8S ribosomal RNA gene, and internal transcribed spacer 2, complete sequence; and 28S ribosomal RNA gene, partial sequence   | 1173      | 1173        | 99%         | 0.0     | 99.69%     | <a href="#">KU877530.1</a> |
| Lepista sordida culture-collection MFLUCC:12-0476 18S ribosomal RNA gene, partial sequence; internal transcribed spacer 1, 5.8S ribosomal RNA gene, and internal transcribed spacer 2, complete sequence; and 28S ribosomal RNA gene, partial sequence   | 1173      | 1173        | 99%         | 0.0     | 99.69%     | <a href="#">KU877529.1</a> |
| Lepista sordida voucher TNS-F-61698 18S ribosomal RNA gene, partial sequence; internal transcribed spacer 1, 5.8S ribosomal RNA gene, and internal transcribed spacer 2, complete sequence; and 28S ribosomal RNA gene, partial sequence                 | 1173      | 1173        | 99%         | 0.0     | 99.69%     | <a href="#">KP293583.1</a> |
| Lepista sordida genomic DNA sequence contains ITS1, 5.8S rRNA gene, ITS2, strain EGDA2                                                                                                                                                                   | 1173      | 1173        | 99%         | 0.0     | 99.69%     | <a href="#">LN827702.1</a> |
| Lepista sordida strain qqhe1 18S ribosomal RNA gene, partial sequence; internal transcribed spacer 1, 5.8S ribosomal RNA gene, and internal transcribed spacer 2, complete sequence; and 28S ribosomal RNA gene, partial sequence                        | 1173      | 1173        | 99%         | 0.0     | 99.69%     | <a href="#">KF874612.1</a> |
| Lepista sordida isolate SMCC39.01.1 18S ribosomal RNA gene, partial sequence; internal transcribed spacer 1, 5.8S ribosomal RNA gene, and internal transcribed spacer 2, complete sequence; and 28S ribosomal RNA gene, partial sequence                 | 1173      | 1173        | 99%         | 0.0     | 99.69%     | <a href="#">FJ501562.1</a> |
| Lepista sordida small subunit ribosomal RNA gene, partial sequence; internal transcribed spacer 1, 5.8S ribosomal RNA gene, and internal transcribed spacer 2, complete sequence; and large subunit ribosomal RNA gene, partial sequence                 | 1170      | 1170        | 99%         | 0.0     | 99.53%     | <a href="#">KJ137272.1</a> |
| Lepista sordida isolate SMCC39.01.4 18S ribosomal RNA gene, partial sequence; internal transcribed spacer 1, 5.8S ribosomal RNA gene, and internal transcribed spacer 2, complete sequence; and 28S ribosomal RNA gene, partial sequence                 | 1168      | 1168        | 99%         | 0.0     | 99.53%     | <a href="#">FJ501563.1</a> |
| Lepista sordida strain IFO 31013 small subunit ribosomal RNA gene, partial sequence; internal transcribed spacer 1, 5.8S ribosomal RNA gene and internal transcribed spacer 2, complete sequence; and large subunit ribosomal RNA gene, partial sequence | 1168      | 1168        | 99%         | 0.0     | 99.53%     | <a href="#">AF241523.1</a> |

| Description                                                                                                                                                                                                                              | Max Score | Total Score | Query Cover | E value | Per. Ident | Accession                  |
|------------------------------------------------------------------------------------------------------------------------------------------------------------------------------------------------------------------------------------------|-----------|-------------|-------------|---------|------------|----------------------------|
| Lepista sordida voucher KA17-0551 small subunit ribosomal RNA gene, partial sequence; internal transcribed spacer 1 and 5.8S ribosomal RNA gene, complete sequence; and internal transcribed spacer 2, partial sequence                  | 1164      | 1164        | 98%         | 0.0     | 99.84%     | <a href="#">MN294842.1</a> |
| Lepista sordida small subunit ribosomal RNA gene, partial sequence; internal transcribed spacer 1, 5.8S ribosomal RNA gene, and internal transcribed spacer 2, complete sequence; and large subunit ribosomal RNA gene, partial sequence | 1162      | 1162        | 99%         | 0.0     | 99.53%     | <a href="#">MH234513.1</a> |
| Lepista sordida voucher EL4-03 (GB) 18S ribosomal RNA gene, partial sequence; internal transcribed spacer 1, 5.8S ribosomal RNA gene, and internal transcribed spacer 2, complete sequence; and 28S ribosomal RNA gene, partial sequence | 1160      | 1160        | 100%        | 0.0     | 99.22%     | <a href="#">JN649350.1</a> |
| Lepista sordida 18S ribosomal RNA gene, partial sequence; internal transcribed spacer 1, 5.8S ribosomal RNA gene, and internal transcribed spacer 2, complete sequence; and 28S ribosomal RNA gene, partial sequence                     | 1158      | 1158        | 98%         | 0.0     | 99.68%     | <a href="#">FJ428582.1</a> |
| Lepista sordida strain MKACC 50097 internal transcribed spacer 1, partial sequence; 5.8S ribosomal RNA gene, complete sequence; and internal transcribed spacer 2, partial sequence                                                      | 1157      | 1157        | 98%         | 0.0     | 99.68%     | <a href="#">AY534114.1</a> |
| Lepista tarda isolate 4517 internal transcribed spacer 1, partial sequence; 5.8S ribosomal RNA gene and internal transcribed spacer 2, complete sequence; and 28S ribosomal RNA gene, partial sequence                                   | 1155      | 1155        | 99%         | 0.0     | 99.22%     | <a href="#">KM406961.1</a> |
| Lepista sordida voucher A22 internal transcribed spacer 1, partial sequence; 5.8S ribosomal RNA gene, complete sequence; and internal transcribed spacer 2, partial sequence                                                             | 1155      | 1155        | 98%         | 0.0     | 99.53%     | <a href="#">JX434648.1</a> |
| Lepista sp. BAB-4764 18S ribosomal RNA gene, partial sequence; internal transcribed spacer 1, 5.8S ribosomal RNA gene, and internal transcribed spacer 2, complete sequence; and 28S ribosomal RNA gene, partial sequence                | 1151      | 1151        | 99%         | 0.0     | 99.07%     | <a href="#">KR154993.1</a> |
| Lepista sordida voucher FLAS-F-60023 internal transcribed spacer 1, partial sequence; 5.8S ribosomal RNA gene and internal transcribed spacer 2, complete sequence; and large subunit ribosomal RNA gene, partial sequence               | 1144      | 1144        | 97%         | 0.0     | 99.52%     | <a href="#">KY654743.1</a> |
| Lepista sordida strain CBS 341.69 18S ribosomal RNA gene, partial sequence; internal transcribed spacer 1, 5.8S ribosomal RNA gene, and internal transcribed spacer 2, complete sequence; and 28S ribosomal RNA gene, partial sequence   | 1142      | 1142        | 98%         | 0.0     | 99.21%     | <a href="#">FJ770391.1</a> |
| Lepista sordida isolate ALV7992 small subunit ribosomal RNA gene, partial sequence; internal transcribed spacer 1 and 5.8S ribosomal RNA gene, complete sequence; and internal transcribed spacer 2, partial sequence                    | 1140      | 1140        | 96%         | 0.0     | 99.84%     | <a href="#">MH644795.1</a> |
| Lepista sordida voucher FLAS-F-61662 internal transcribed spacer 1, partial sequence; 5.8S ribosomal RNA gene, complete sequence; and internal transcribed spacer 2, partial sequence                                                    | 1140      | 1140        | 97%         | 0.0     | 99.52%     | <a href="#">MH212036.1</a> |

| Description                                                                                                                                                                                                                             | Max Score | Total Score | Query Cover | E value | Per. Ident | Accession                  |
|-----------------------------------------------------------------------------------------------------------------------------------------------------------------------------------------------------------------------------------------|-----------|-------------|-------------|---------|------------|----------------------------|
| Lepista sordida isolate LMBC 171 internal transcribed spacer 1, partial sequence; 5.8S ribosomal RNA gene and internal transcribed spacer 2, complete sequence; and large subunit ribosomal RNA gene, partial sequence                  | 1134      | 1134        | 97%         | 0.0     | 99.36%     | <a href="#">MN625448.1</a> |
| Lepista sordida voucher ubc F32595 18S ribosomal RNA gene, partial sequence; internal transcribed spacer 1, 5.8S ribosomal RNA gene, and internal transcribed spacer 2, complete sequence; and 28S ribosomal RNA gene, partial sequence | 1131      | 1131        | 97%         | 0.0     | 99.20%     | <a href="#">MG969982.1</a> |
| Lepista sordida voucher ubc F32589 18S ribosomal RNA gene, partial sequence; internal transcribed spacer 1, 5.8S ribosomal RNA gene, and internal transcribed spacer 2, complete sequence; and 28S ribosomal RNA gene, partial sequence | 1131      | 1131        | 97%         | 0.0     | 99.20%     | <a href="#">MG969981.1</a> |
| Lepista sordida voucher 201901100801 small subunit ribosomal RNA gene, partial sequence; internal transcribed spacer 1 and 5.8S ribosomal RNA gene, complete sequence; and internal transcribed spacer 2, partial sequence              | 1129      | 1129        | 96%         | 0.0     | 99.36%     | <a href="#">MN998150.1</a> |
| Lepista sordida voucher SYAU-FUNGI-040 internal transcribed spacer 1, partial sequence; 5.8S ribosomal RNA gene and internal transcribed spacer 2, complete sequence; and 28S ribosomal RNA gene, partial sequence                      | 1123      | 1123        | 95%         | 0.0     | 99.67%     | <a href="#">MK116606.1</a> |
| Lepista sordida voucher SYAU-FUNGI-039 internal transcribed spacer 1, partial sequence; 5.8S ribosomal RNA gene and internal transcribed spacer 2, complete sequence; and 28S ribosomal RNA gene, partial sequence                      | 1123      | 1123        | 95%         | 0.0     | 99.67%     | <a href="#">MK116605.1</a> |
| Lepista sordida voucher GIM5.315 18S ribosomal RNA gene, partial sequence; internal transcribed spacer 1 and 5.8S ribosomal RNA gene, complete sequence; and internal transcribed spacer, partial sequence                              | 1120      | 1120        | 94%         | 0.0     | 99.84%     | <a href="#">JF420892.1</a> |
| Lepista sordida voucher SYAU-FUNGI-044 internal transcribed spacer 1, partial sequence; 5.8S ribosomal RNA gene and internal transcribed spacer 2, complete sequence; and 28S ribosomal RNA gene, partial sequence                      | 1118      | 1118        | 95%         | 0.0     | 99.51%     | <a href="#">MK116608.1</a> |
| Clitocybe tarda var. alcalina voucher TENN:023387 internal transcribed spacer 1, partial sequence; 5.8S ribosomal RNA gene, complete sequence; and internal transcribed spacer 2, partial sequence                                      | 1107      | 1107        | 93%         | 0.0     | 99.83%     | <a href="#">HQ179666.1</a> |
| Lepista sordida voucher HFJAU0263 small subunit ribosomal RNA gene, partial sequence; internal transcribed spacer 1 and 5.8S ribosomal RNA gene, complete sequence; and internal transcribed spacer 2, partial sequence                 | 1099      | 1099        | 99%         | 0.0     | 97.80%     | <a href="#">MN258660.1</a> |
| Lepista sp. voucher MES-1615 internal transcribed spacer 1, partial sequence; 5.8S ribosomal RNA gene, complete sequence; and internal transcribed spacer 2, partial sequence                                                           | 1098      | 1098        | 93%         | 0.0     | 99.50%     | <a href="#">KY462501.1</a> |

| Description                                                                                                                                                                                                                                                 | Max Score | Total Score | Query Cover | E value | Per. Ident | Accession                  |
|-------------------------------------------------------------------------------------------------------------------------------------------------------------------------------------------------------------------------------------------------------------|-----------|-------------|-------------|---------|------------|----------------------------|
| Lepista nuda voucher 420526MF004 small subunit ribosomal RNA gene, partial sequence; internal transcribed spacer 1, 5.8S ribosomal RNA gene, and internal transcribed spacer 2, complete sequence; and large subunit ribosomal RNA gene, partial sequence   | 1096      | 1096        | 99%         | 0.0     | 97.51%     | <a href="#">MG719766.1</a> |
| Lepista sordida strain xsd08104 18S ribosomal RNA gene, partial sequence; internal transcribed spacer 1, 5.8S ribosomal RNA gene, and internal transcribed spacer 2, complete sequence; and 28S ribosomal RNA gene, partial sequence                        | 1096      | 1096        | 99%         | 0.0     | 97.51%     | <a href="#">FJ481015.1</a> |
| Lepista sordida strain ts916 internal transcribed spacer 1, partial sequence; 5.8S ribosomal RNA gene and internal transcribed spacer 2, complete sequence; and large subunit ribosomal RNA gene, partial sequence                                          | 1090      | 1090        | 98%         | 0.0     | 97.64%     | <a href="#">MG516585.1</a> |
| Lepista sordida voucher G1 internal transcribed spacer 1, partial sequence; 5.8S ribosomal RNA gene and internal transcribed spacer 2, complete sequence; and large subunit ribosomal RNA gene, partial sequence                                            | 1081      | 1081        | 94%         | 0.0     | 98.85%     | <a href="#">MF384327.1</a> |
| Lepista sordida Ls17-1 genes for ITS1, 5.8S rRNA, ITS2, 28S rRNA, partial and complete sequence                                                                                                                                                             | 1072      | 1072        | 90%         | 0.0     | 99.83%     | <a href="#">LC370449.1</a> |
| Lepista sordida var. aianthina strain MCVE 28714 small subunit ribosomal RNA gene, partial sequence; internal transcribed spacer 1 and 5.8S ribosomal RNA gene, complete sequence; and internal transcribed spacer 2, partial sequence                      | 1070      | 1070        | 91%         | 0.0     | 99.32%     | <a href="#">KU577457.1</a> |
| Lepista sordida voucher MHHNU 31387 internal transcribed spacer 1, partial sequence; 5.8S ribosomal RNA gene, complete sequence; and internal transcribed spacer 2, partial sequence                                                                        | 1051      | 1051        | 96%         | 0.0     | 97.26%     | <a href="#">MK214400.1</a> |
| Clitocybe cf. nuda voucher JLF8423 small subunit ribosomal RNA gene, partial sequence; internal transcribed spacer 1, 5.8S ribosomal RNA gene, and internal transcribed spacer 2, complete sequence; and large subunit ribosomal RNA gene, partial sequence | 1037      | 1037        | 99%         | 0.0     | 95.81%     | <a href="#">MT360912.1</a> |
| Tricholoma mongolicum voucher HMJAU:24946 18S ribosomal RNA gene, partial sequence; internal transcribed spacer 1, 5.8S ribosomal RNA gene, and internal transcribed spacer 2, complete sequence; and 28S ribosomal RNA gene, partial sequence              | 1037      | 1037        | 99%         | 0.0     | 95.95%     | <a href="#">KC413949.1</a> |
| Tricholoma mongolicum voucher HMJAU:24945 18S ribosomal RNA gene, partial sequence; internal transcribed spacer 1, 5.8S ribosomal RNA gene, and internal transcribed spacer 2, complete sequence; and 28S ribosomal RNA gene, partial sequence              | 1037      | 1037        | 99%         | 0.0     | 95.95%     | <a href="#">KC413948.1</a> |
| Tricholoma mongolicum voucher HMJAU:24940 18S ribosomal RNA gene, partial sequence; internal transcribed spacer 1, 5.8S ribosomal RNA gene, and internal transcribed spacer 2, complete sequence; and 28S ribosomal RNA gene, partial sequence              | 1037      | 1037        | 99%         | 0.0     | 95.95%     | <a href="#">KC413943.1</a> |

| Description                                                                                                                                                                                                                                                | Max Score | Total Score | Query Cover | E value | Per. Ident | Accession                  |
|------------------------------------------------------------------------------------------------------------------------------------------------------------------------------------------------------------------------------------------------------------|-----------|-------------|-------------|---------|------------|----------------------------|
| Lepista saeva voucher 3684 small subunit ribosomal RNA gene, partial sequence; internal transcribed spacer 1, 5.8S ribosomal RNA gene, and internal transcribed spacer 2, complete sequence; and large subunit ribosomal RNA gene, partial sequence        | 1033      | 1033        | 99%         | 0.0     | 95.81%     | <a href="#">MH930154.1</a> |
| Tricholoma mongolicum voucher HMJAU:24939 18S ribosomal RNA gene, partial sequence; internal transcribed spacer 1, 5.8S ribosomal RNA gene, and internal transcribed spacer 2, complete sequence; and 28S ribosomal RNA gene, partial sequence             | 1033      | 1033        | 99%         | 0.0     | 95.94%     | <a href="#">KC413942.1</a> |
| Tricholoma mongolicum voucher HMJAU:24942 18S ribosomal RNA gene, partial sequence; internal transcribed spacer 1, 5.8S ribosomal RNA gene, and internal transcribed spacer 2, complete sequence; and 28S ribosomal RNA gene, partial sequence             | 1029      | 1029        | 99%         | 0.0     | 95.79%     | <a href="#">KC413945.1</a> |
| Tricholoma mongolicum voucher HMJAU:24941 18S ribosomal RNA gene, partial sequence; internal transcribed spacer 1, 5.8S ribosomal RNA gene, and internal transcribed spacer 2, complete sequence; and 28S ribosomal RNA gene, partial sequence             | 1029      | 1029        | 99%         | 0.0     | 95.79%     | <a href="#">KC413944.1</a> |
| Uncultured fungus clone 4248_938 small subunit ribosomal RNA gene, partial sequence; internal transcribed spacer 1, 5.8S ribosomal RNA gene, and internal transcribed spacer 2, complete sequence; and large subunit ribosomal RNA gene, partial sequence  | 1026      | 1026        | 99%         | 0.0     | 95.65%     | <a href="#">MT236893.1</a> |
| Leucocalocybe mongolica strain ba small subunit ribosomal RNA gene, partial sequence; internal transcribed spacer 1, 5.8S ribosomal RNA gene, and internal transcribed spacer 2, complete sequence; and large subunit ribosomal RNA gene, partial sequence | 1026      | 1026        | 99%         | 0.0     | 95.65%     | <a href="#">KY401344.1</a> |
| Tricholoma mongolicum voucher HMJAU:24943 18S ribosomal RNA gene, partial sequence; internal transcribed spacer 1, 5.8S ribosomal RNA gene, and internal transcribed spacer 2, complete sequence; and 28S ribosomal RNA gene, partial sequence             | 1024      | 1024        | 99%         | 0.0     | 95.64%     | <a href="#">KC413946.1</a> |
| Tricholoma mongolicum voucher HMJAU:24938 18S ribosomal RNA gene, partial sequence; internal transcribed spacer 1, 5.8S ribosomal RNA gene, and internal transcribed spacer 2, complete sequence; and 28S ribosomal RNA gene, partial sequence             | 1024      | 1024        | 99%         | 0.0     | 95.64%     | <a href="#">KC413941.1</a> |
| Tricholoma mongolicum voucher HMJAU:24944 18S ribosomal RNA gene, partial sequence; internal transcribed spacer 1, 5.8S ribosomal RNA gene, and internal transcribed spacer 2, complete sequence; and 28S ribosomal RNA gene, partial sequence             | 1022      | 1022        | 99%         | 0.0     | 95.77%     | <a href="#">KC413947.1</a> |
| Clitocybe cf. nuda voucher Mushroom Observer 329535 internal transcribed spacer 1, partial sequence; 5.8S ribosomal RNA gene and internal transcribed spacer 2, complete sequence; and large subunit ribosomal RNA gene, partial sequence                  | 1018      | 1018        | 99%         | 0.0     | 95.48%     | <a href="#">MT357078.1</a> |

| Description                                                                                                                                                                                                                                                              | Max Score | Total Score | Query Cover | E value | Per. Ident | Accession                  |
|--------------------------------------------------------------------------------------------------------------------------------------------------------------------------------------------------------------------------------------------------------------------------|-----------|-------------|-------------|---------|------------|----------------------------|
| Leucocalocybe mongolica strain MCCJLAU2015C1 small subunit ribosomal RNA gene, partial sequence; internal transcribed spacer 1 and 5.8S ribosomal RNA gene, complete sequence; and internal transcribed spacer 2, partial sequence                                       | 1018      | 1018        | 98%         | 0.0     | 95.75%     | <a href="#">KX641897.1</a> |
| Leucocalocybe mongolica voucher HMAS 281506 internal transcribed spacer 1, partial sequence; 5.8S ribosomal RNA gene and internal transcribed spacer 2, complete sequence; and large subunit ribosomal RNA gene, partial sequence                                        | 1005      | 1005        | 97%         | 0.0     | 95.70%     | <a href="#">MK966647.1</a> |
| Lepista nuda strain dd08044 18S ribosomal RNA gene, partial sequence; internal transcribed spacer 1, 5.8S ribosomal RNA gene, and internal transcribed spacer 2, complete sequence; and 28S ribosomal RNA gene, partial sequence                                         | 1003      | 1003        | 99%         | 0.0     | 94.91%     | <a href="#">FJ810156.1</a> |
| Lepista nuda genes for 18S rRNA, ITS1, 5.8S rRNA, ITS2, 28S rRNA, partial and complete sequence, strain: LN13-1                                                                                                                                                          | 1000      | 1000        | 99%         | 0.0     | 94.89%     | <a href="#">LC144831.1</a> |
| Lepista sordida voucher AH39056 18S ribosomal RNA gene, partial sequence; internal transcribed spacer 1, 5.8S ribosomal RNA gene, and internal transcribed spacer 2, complete sequence; and 28S ribosomal RNA gene, partial sequence                                     | 1000      | 1000        | 98%         | 0.0     | 95.27%     | <a href="#">KJ681018.1</a> |
| Lepista saeva voucher AH39129 18S ribosomal RNA gene, partial sequence; internal transcribed spacer 1, 5.8S ribosomal RNA gene, and internal transcribed spacer 2, complete sequence; and 28S ribosomal RNA gene, partial sequence                                       | 998       | 998         | 98%         | 0.0     | 95.13%     | <a href="#">KJ681014.1</a> |
| Clitocybe fragrans voucher 2148 18S ribosomal RNA gene, internal transcribed spacer 1, 5.8S ribosomal RNA gene, internal transcribed spacer 2, and 28S ribosomal RNA gene, region                                                                                        | 998       | 998         | 99%         | 0.0     | 94.88%     | <a href="#">JF907811.1</a> |
| Lepista nuda genes for 18S rRNA, ITS1, 5.8S rRNA, ITS2, 28S rRNA, partial and complete sequence, clone: HS_1_ITS_060920_12                                                                                                                                               | 998       | 998         | 99%         | 0.0     | 94.75%     | <a href="#">AB285100.1</a> |
| Clitocybe sp. voucher S.D. Russell MycoMap 6981 small subunit ribosomal RNA gene, partial sequence; internal transcribed spacer 1, 5.8S ribosomal RNA gene, and internal transcribed spacer 2, complete sequence; and large subunit ribosomal RNA gene, partial sequence | 996       | 996         | 99%         | 0.0     | 94.74%     | <a href="#">MK532771.1</a> |
| Lepista sp. AH39232 18S ribosomal RNA gene, partial sequence; internal transcribed spacer 1, 5.8S ribosomal RNA gene, and internal transcribed spacer 2, complete sequence; and 28S ribosomal RNA gene, partial sequence                                                 | 996       | 996         | 98%         | 0.0     | 95.12%     | <a href="#">KJ681017.1</a> |
| Lepista nuda Ln16-1 genes for ITS1, 5.8S rRNA, ITS2, 28S rRNA, partial and complete sequence                                                                                                                                                                             | 994       | 994         | 99%         | 0.0     | 94.74%     | <a href="#">LC370440.1</a> |
| Lepista nuda genes for 18S rRNA, ITS1, 5.8S rRNA, ITS2, 28S rRNA, partial and complete sequence, strain: LN13-2                                                                                                                                                          | 994       | 994         | 98%         | 0.0     | 94.87%     | <a href="#">LC144832.1</a> |



| Description                                                                                                                                                                                                                                                         | Max Score | Total Score | Query Cover | E value | Per. Ident | Accession                  |
|---------------------------------------------------------------------------------------------------------------------------------------------------------------------------------------------------------------------------------------------------------------------|-----------|-------------|-------------|---------|------------|----------------------------|
| Lepista sordida voucher AH39148 18S ribosomal RNA gene, partial sequence; internal transcribed spacer 1, 5.8S ribosomal RNA gene, and internal transcribed spacer 2, complete sequence; and 28S ribosomal RNA gene, partial sequence                                | 994       | 994         | 98%         | 0.0     | 95.11%     | <a href="#">KJ681020.1</a> |
| Lepista sordida voucher AH39147 18S ribosomal RNA gene, partial sequence; internal transcribed spacer 1, 5.8S ribosomal RNA gene, and internal transcribed spacer 2, complete sequence; and 28S ribosomal RNA gene, partial sequence                                | 994       | 994         | 97%         | 0.0     | 95.25%     | <a href="#">KJ681019.1</a> |
| Clitocybe sp. 2 PA-2015 voucher AH42904 18S ribosomal RNA gene, partial sequence; internal transcribed spacer 1, 5.8S ribosomal RNA gene, and internal transcribed spacer 2, complete sequence; and 28S ribosomal RNA gene, partial sequence                        | 994       | 994         | 99%         | 0.0     | 94.60%     | <a href="#">KJ680982.1</a> |
| Lepista nuda Ln17-6 genes for ITS1, 5.8S rRNA, ITS2, 28S rRNA, partial and complete sequence                                                                                                                                                                        | 992       | 992         | 99%         | 0.0     | 94.73%     | <a href="#">LC370447.1</a> |
| Uncultured fungus clone TSPF_32 18S ribosomal RNA gene, partial sequence; internal transcribed spacer 1, 5.8S ribosomal RNA gene, and internal transcribed spacer 2, complete sequence; and 28S ribosomal RNA gene, partial sequence                                | 992       | 992         | 99%         | 0.0     | 94.60%     | <a href="#">FJ213528.1</a> |
| Uncultured fungus clone TSPF_1 18S ribosomal RNA gene, partial sequence; internal transcribed spacer 1, 5.8S ribosomal RNA gene, and internal transcribed spacer 2, complete sequence; and 28S ribosomal RNA gene, partial sequence                                 | 992       | 992         | 99%         | 0.0     | 94.60%     | <a href="#">FJ213504.1</a> |
| Lepista nuda genes for 18S rRNA, ITS1, 5.8S rRNA, ITS2, 28S rRNA, partial and complete sequence, clone: HS_1 ITS_060920_11                                                                                                                                          | 992       | 992         | 99%         | 0.0     | 94.60%     | <a href="#">AB285106.1</a> |
| Tricholoma mongolicum strain M5 internal transcribed spacer 1, partial sequence; 5.8S ribosomal RNA gene, complete sequence; and internal transcribed spacer 2, partial sequence                                                                                    | 990       | 990         | 95%         | 0.0     | 95.79%     | <a href="#">HQ446478.1</a> |
| Tricholoma mongolicum strain M2 internal transcribed spacer 1, partial sequence; 5.8S ribosomal RNA gene, complete sequence; and internal transcribed spacer 2, partial sequence                                                                                    | 990       | 990         | 95%         | 0.0     | 95.79%     | <a href="#">HQ446476.1</a> |
| Collybia tuberosa voucher MQ17019-QFB29527 small subunit ribosomal RNA gene, partial sequence; internal transcribed spacer 1, 5.8S ribosomal RNA gene, and internal transcribed spacer 2, complete sequence; and large subunit ribosomal RNA gene, partial sequence | 989       | 989         | 99%         | 0.0     | 94.58%     | <a href="#">MN992575.1</a> |
| Collybia tuberosa voucher ANT217-QFB28689 small subunit ribosomal RNA gene, partial sequence; internal transcribed spacer 1, 5.8S ribosomal RNA gene, and internal transcribed spacer 2, complete sequence; and large subunit ribosomal RNA gene, partial sequence  | 989       | 989         | 99%         | 0.0     | 94.58%     | <a href="#">MN992323.1</a> |



| Description                                                                                                                                                                                                                                                                       | Max Score | Total Score | Query Cover | E value | Per. Ident | Accession                  |
|-----------------------------------------------------------------------------------------------------------------------------------------------------------------------------------------------------------------------------------------------------------------------------------|-----------|-------------|-------------|---------|------------|----------------------------|
| Collybia tuberosa voucher ANT116-QFB28739 small subunit ribosomal RNA gene, partial sequence; internal transcribed spacer 1, 5.8S ribosomal RNA gene, and internal transcribed spacer 2, complete sequence; and large subunit ribosomal RNA gene, partial sequence                | 989       | 989         | 99%         | 0.0     | 94.58%     | <a href="#">MN992322.1</a> |
| Collybia tuberosa voucher MQ18R163-QFB30679 small subunit ribosomal RNA gene, partial sequence; internal transcribed spacer 1, 5.8S ribosomal RNA gene, and internal transcribed spacer 2, complete sequence; and large subunit ribosomal RNA gene, partial sequence              | 989       | 989         | 99%         | 0.0     | 94.58%     | <a href="#">MN992127.1</a> |
| Collybia tuberosa voucher MQ18R245-QFB30761 internal transcribed spacer 1, partial sequence; 5.8S ribosomal RNA gene and internal transcribed spacer 2, complete sequence; and large subunit ribosomal RNA gene, partial sequence                                                 | 989       | 989         | 99%         | 0.0     | 94.57%     | <a href="#">MN992126.1</a> |
| Lepista saeva voucher AH39154 18S ribosomal RNA gene, partial sequence; internal transcribed spacer 1, 5.8S ribosomal RNA gene, and internal transcribed spacer 2, complete sequence; and 28S ribosomal RNA gene, partial sequence                                                | 989       | 989         | 98%         | 0.0     | 94.95%     | <a href="#">KJ681015.1</a> |
| Lepista saeva small subunit ribosomal RNA gene, partial sequence; internal transcribed spacer 1, 5.8S ribosomal RNA gene, and internal transcribed spacer 2, complete sequence; and large subunit ribosomal RNA gene, partial sequence                                            | 989       | 989         | 99%         | 0.0     | 94.71%     | <a href="#">KJ137270.1</a> |
| Uncultured fungus DNA sequence containing 18S rRNA gene, ITS1, 5.8S rRNA gene, ITS2 and 28S rRNA gene, isolate B0809                                                                                                                                                              | 989       | 989         | 99%         | 0.0     | 94.71%     | <a href="#">FM999669.1</a> |
| Collybia tuberosa strain DAOM 191061 18S ribosomal RNA gene, partial sequence; internal transcribed spacer 1, 5.8S ribosomal RNA gene and internal transcribed spacer 2, complete sequence; and large subunit ribosomal RNA gene, partial sequence                                | 989       | 989         | 99%         | 0.0     | 94.58%     | <a href="#">AF274376.1</a> |
| Collybia tuberosa strain Tennessee 7265 18S ribosomal RNA gene, partial sequence; internal transcribed spacer 1, 5.8S ribosomal RNA gene and internal transcribed spacer 2, complete sequence; and large subunit ribosomal RNA gene, partial sequence                             | 989       | 989         | 99%         | 0.0     | 94.58%     | <a href="#">AF065124.1</a> |
| Clitocybe sp. 1 JL-2020 voucher MQ17063-QFB29571-HRL2439 small subunit ribosomal RNA gene, partial sequence; internal transcribed spacer 1, 5.8S ribosomal RNA gene, and internal transcribed spacer 2, complete sequence; and large subunit ribosomal RNA gene, partial sequence | 987       | 987         | 99%         | 0.0     | 94.57%     | <a href="#">MN992572.1</a> |
| Clitocybe sp. voucher Mushroom Observer # 303033 small subunit ribosomal RNA gene, partial sequence; internal transcribed spacer 1, 5.8S ribosomal RNA gene, and internal transcribed spacer 2, complete sequence; and large subunit ribosomal RNA gene, partial sequence         | 987       | 987         | 99%         | 0.0     | 94.56%     | <a href="#">MK607562.1</a> |
| Lepista nuda Ln17-2 genes for ITS1, 5.8S rRNA, ITS2, 28S rRNA, partial and complete sequence                                                                                                                                                                                      | 987       | 987         | 98%         | 0.0     | 94.84%     | <a href="#">LC370443.1</a> |

| Description                                                                                                                                                                                                                                                              | Max Score | Total Score | Query Cover | E value | Per. Ident | Accession                  |
|--------------------------------------------------------------------------------------------------------------------------------------------------------------------------------------------------------------------------------------------------------------------------|-----------|-------------|-------------|---------|------------|----------------------------|
| Lepista irina Li16-2 genes for ITS1, 5.8S rRNA, ITS2, 28S rRNA, partial and complete sequence                                                                                                                                                                            | 987       | 987         | 99%         | 0.0     | 94.70%     | <a href="#">LC370439.1</a> |
| Tricholoma mongolicum strain M7 internal transcribed spacer 1, partial sequence; 5.8S ribosomal RNA gene, complete sequence; and internal transcribed spacer 2, partial sequence                                                                                         | 987       | 987         | 95%         | 0.0     | 95.77%     | <a href="#">HQ446480.1</a> |
| Collybia tuberosa isolate AFTOL-ID 557 18S ribosomal RNA gene, partial sequence; internal transcribed spacer 1, 5.8S ribosomal RNA gene, and internal transcribed spacer 2, complete sequence; and 25S ribosomal RNA gene, partial sequence                              | 987       | 987         | 99%         | 0.0     | 94.57%     | <a href="#">AY854072.1</a> |
| Gymnopus sp. 1 JL-2020 voucher MQ17235-QFB29743 small subunit ribosomal RNA gene, partial sequence; internal transcribed spacer 1, 5.8S ribosomal RNA gene, and internal transcribed spacer 2, complete sequence; and large subunit ribosomal RNA gene, partial sequence | 985       | 985         | 99%         | 0.0     | 94.56%     | <a href="#">MN992594.1</a> |
| Clitocybe odora voucher MQ18R044-QFB30127 small subunit ribosomal RNA gene, partial sequence; internal transcribed spacer 1, 5.8S ribosomal RNA gene, and internal transcribed spacer 2, complete sequence; and large subunit ribosomal RNA gene, partial sequence       | 985       | 985         | 99%         | 0.0     | 94.56%     | <a href="#">MN992124.1</a> |
| Clitocybe odora voucher 121 small subunit ribosomal RNA gene, partial sequence; internal transcribed spacer 1, 5.8S ribosomal RNA gene, and internal transcribed spacer 2, complete sequence; and large subunit ribosomal RNA gene, partial sequence                     | 985       | 985         | 99%         | 0.0     | 94.56%     | <a href="#">MH930123.1</a> |
| Clitocybe sp. voucher 140_F06 small subunit ribosomal RNA gene, partial sequence; internal transcribed spacer 1 and 5.8S ribosomal RNA gene, complete sequence; and internal transcribed spacer 2, partial sequence                                                      | 985       | 985         | 98%         | 0.0     | 94.83%     | <a href="#">MK627492.1</a> |
| Lepista irina strain CBS 551.87 small subunit ribosomal RNA gene, partial sequence; internal transcribed spacer 1, 5.8S ribosomal RNA gene, and internal transcribed spacer 2, complete sequence; and large subunit ribosomal RNA gene, partial sequence                 | 985       | 985         | 99%         | 0.0     | 94.56%     | <a href="#">MH862097.1</a> |
| Lepista irina strain CBS 366.47 small subunit ribosomal RNA gene, partial sequence; internal transcribed spacer 1, 5.8S ribosomal RNA gene, and internal transcribed spacer 2, complete sequence; and large subunit ribosomal RNA gene, partial sequence                 | 985       | 985         | 99%         | 0.0     | 94.56%     | <a href="#">MH856287.1</a> |
| Lepista saeva strain BAH08 (TENN) small subunit ribosomal RNA gene, partial sequence; internal transcribed spacer 1, 5.8S ribosomal RNA gene, and internal transcribed spacer 2, complete sequence; and large subunit ribosomal RNA gene, partial sequence               | 985       | 985         | 99%         | 0.0     | 94.56%     | <a href="#">MF773596.1</a> |
| Clitocybe sp. 1 PA-2015 voucher AH42909 18S ribosomal RNA gene, partial sequence; internal transcribed spacer 1, 5.8S ribosomal RNA gene, and internal transcribed spacer 2, complete sequence; and 28S ribosomal RNA gene, partial sequence                             | 985       | 985         | 99%         | 0.0     | 94.56%     | <a href="#">KJ680987.1</a> |

| Description                                                                                                                                                                                                                                              | Max Score | Total Score | Query Cover | E value | Per. Ident | Accession                  |
|----------------------------------------------------------------------------------------------------------------------------------------------------------------------------------------------------------------------------------------------------------|-----------|-------------|-------------|---------|------------|----------------------------|
| Lepista nuda voucher CNF 1/7291 small subunit ribosomal RNA gene, partial sequence; internal transcribed spacer 1, 5.8S ribosomal RNA gene, and internal transcribed spacer 2, complete sequence; and large subunit ribosomal RNA gene, partial sequence | 983       | 983         | 99%         | 0.0     | 94.30%     | <a href="#">MK169235.1</a> |

## Alignments

Lepista sordida culture-collection MFLUCC:13-0898 18S ribosomal RNA gene, partial sequence; internal transcribed spacer 1, 5.8S ribosomal RNA gene, and internal transcribed spacer 2, complete sequence; and 28S ribosomal RNA gene, partial sequence  
 Sequence ID: **KU877531.1** Length: 672 Number of Matches: 1  
 Range 1: 14 to 655

| Score          | Expect | Identities   | Gaps      | Strand     | Frame |
|----------------|--------|--------------|-----------|------------|-------|
| 1173 bits(635) | 0.0()  | 640/642(99%) | 1/642(0%) | Plus/Minus |       |

Features:

|       |     |                                                              |     |
|-------|-----|--------------------------------------------------------------|-----|
| Query | 1   | TCCTACCTGATTTGAGGTCAAAA-TGTCATAAATTTGTCCAAGTCAATGGACTGTTAGAA | 59  |
| Sbjct | 655 | TCCTACCTGATTTGAGGTCAAAAATGTCATAAATTTGTCCAAGTCAATGGACTGTTAGAA | 596 |
| Query | 60  | GCTGAACCCCATGTTAAAGTGCTTCACAACCATGGCGTAGATAATTATCACACCAAAAAG | 119 |
| Sbjct | 595 | GCTGAACCCCATGTTAAAGTGCTTCACAACCATGGCGTAGATAATTATCACACCAAAAAG | 536 |
| Query | 120 | CTGGTCCACAAAGGTTCCGCTAATGCATTTAAGAGGAGCCGACTTCTAGAGAAGCCCGCA | 179 |
| Sbjct | 535 | CTGGTCCACAAAGGTTCCGCTAATGCATTTAAGAGGAGCCGACTTCTAGAGAAGCCCGCA | 476 |
| Query | 180 | ATAACCTCCACATCCAAGCCAATCCAACCTGCAAAAAGCTGAAAAGTTGAGAATTTAATG | 239 |
| Sbjct | 475 | ATAACCTCCACATCCAAGCCAATCCAACCTGCAAAAAGCTGAAAAGTTGAGAATTTAATG | 416 |
| Query | 240 | ACACTCAAACAGGCATGCTCCTCGGAATACCAAGGAGCGCAAGGTGCGTTCAAAGATTCG | 299 |
| Sbjct | 415 | ACACTCAAACAGGCATGCTCCTCGGAATACCAAGGAGCGCAAGGTGCGTTCAAAGATTCG | 356 |
| Query | 300 | ATGATTCACCTGAATTCTGCAATTCACATTAATCGCATTTCGCTGCGTTCTTCATCGA   | 359 |
| Sbjct | 355 | ATGATTCACCTGAATTCTGCAATTCACATTAATCGCATTTCGCTGCGTTCTTCATCGA   | 296 |
| Query | 360 | TGCGAGAGCCAAGAGATCCGTTGTTGAAAGTTGTATTAATTTAAAGGCATAAAGCCCAT  | 419 |
| Sbjct | 295 | TGCGAGAGCCAAGAGATCCGTTGTTGAAAGTTGTATTAATTTAAAGGCATAAAGCCCAT  | 236 |
| Query | 420 | AATAACATTCATTATACATTTCTATGGGGTATAATAAAAAATAGACTTGAAACACAAGGA | 479 |
| Sbjct | 235 | AATAACATTCATTATACATTTCTATGGGGTATAATAAAAAATAGACTTGAAACACAAGGA | 176 |
| Query | 480 | AAGCCATGTTTGACACAGCATTCTCAAACCGAGTTTCTCGAGAGTTGTTTCAAATCT    | 539 |
| Sbjct | 175 | AAGCCATGTTTGACACAGCATTCTCAAACCGAGTTTCTCGAGAGTTGTTTCAAATCT    | 116 |
| Query | 540 | ACAAAAGGTGCACAGGTGGTAAAAATGGTGCTAGGCGTGACATGCTCCAAAAAGCCAGC  | 599 |
| Sbjct | 115 | ACAAAAGGTGCACAGGTGGTAAAAATGGTGCTAGGCGTGACATGCTCCAAAAAGCCAGC  | 56  |
| Query | 600 | ACAACCCAACCAAGTTTATTCATAATGATCCTTCCGAGGT                     | 641 |
| Sbjct | 55  | ACAACCCAACCAAGTTTATTCATAATGATCCTTCCGAGGT                     | 14  |

Lepista sordida culture-collection MFLUCC:14-0769 18S ribosomal RNA gene, partial sequence; internal transcribed spacer 1, 5.8S ribosomal RNA gene, and internal transcribed spacer 2, complete sequence; and 28S ribosomal RNA gene, partial sequence  
 Sequence ID: **KU877530.1** Length: 672 Number of Matches: 1  
 Range 1: 14 to 655

| Score          | Expect | Identities   | Gaps      | Strand     | Frame |
|----------------|--------|--------------|-----------|------------|-------|
| 1173 bits(635) | 0.0()  | 640/642(99%) | 1/642(0%) | Plus/Minus |       |

Features:

|       |     |                                                              |     |
|-------|-----|--------------------------------------------------------------|-----|
| Query | 1   | TCCTACCTGATTTGAGGTCAAAA-TGTCATAAATTTGTCCAAGTCAATGGACTGTTAGAA | 59  |
| Sbjct | 655 | TCCTACCTGATTTGAGGTCAAAAATGTCATAAATTTGTCCAAGTCAATGGACTGTTAGAA | 596 |
| Query | 60  | GCTGAACCCCATGTTAAAGTGCTTCACAACCATGGCGTAGATAATTATCACACCAAAAAG | 119 |
| Sbjct | 595 | GCTGAACCCCATGTTAAAGTGCTTCACAACCATGGCGTAGATAATTATCACACCAAAAAG | 536 |
| Query | 120 | CTGGTCCACAAAGGTTCCGCTAATGCATTTAAGAGGAGCCGACTTCTAGAGAAGCCCGCA | 179 |
| Sbjct | 535 | CTGGTCCACAAAGGTTCCGCTAATGCATTTAAGAGGAGCCGACTTCTAGAGAAGCCCGCA | 476 |

```

Query 180 ATAACCTCCACATCCAAGCCAATCCAACCTGCAAAAGCTGAAAAGGTTGAGAATTTAATG 239
Sbjct 475 ATAACCTCCACATCCAAGCCAATCCAACCTGCAAAAGCTGAAAAGGTTGAGAATTTAATG 416
Query 240 ACACTCAAAACAGGCATGCTCCTCGGAATACCAAGGAGCGCAAGGTGCGTTCAAAGATTG 299
Sbjct 415 ACACTCAAAACAGGCATGCTCCTCGGAATACCAAGGAGCGCAAGGTGCGTTCAAAGATTG 356
Query 300 ATGATTCACTGAATTCTGCAATTCACATTACTTATCGCATTTCGCTGCGTTCTTCATCGA 359
Sbjct 355 ATGATTCACTGAATTCTGCAATTCACATTACTTATCGCATTTCGCTGCGTTCTTCATCGA 296
Query 360 TCGGAGAGCCAAGAGATCCGTTGTTGAAAAGTTGTATTAATTTAAAGGCATAAAGCCCATT 419
Sbjct 295 TCGGAGAGCCAAGAGATCCGTTGTTGAAAAGTTGTATTAATTTAAAGGCATAAAGCCCATT 236
Query 420 AATAACATTCTATTACATTCTTATGGGGTATAATAAAAAACATAGACTTGAAACACAAGGA 479
Sbjct 235 AATAACATTCTATTACATTCTTATGGGGTATAATAAAAAACATAGACTTGAAACACAAGGA 176
Query 480 AAGCCATGTTGCACACAGCATTCTCAAACCGAGTTTCTCGAGAGTTGTTTCAAATCT 539
Sbjct 175 AAGCCATGTTGCACACAGCATTCTCAAACCGAGTTTCTCGAGAGTTGTTTCAAATCT 116
Query 540 ACAAAAAGGTGCACAGGTGGTAAAAATGGTGTAGGCGTGCACATGCTCCAAAAAGCCAGC 599
Sbjct 115 ACAAAAAGGTGCACAGGTGGTAAAAATGGGCTAGGCGTGCACATGCTCCAAAAAGCCAGC 56
Query 600 ACAACCCAACCAAGTTTATTCAATAATGATCCTTCCGAGGT 641
Sbjct 55 ACAACCCAACCAAGTTTATTCAATAATGATCCTTCCGAGGT 14
    
```

Lepista sordida culture-collection MFLUCC:12-0476 18S ribosomal RNA gene, partial sequence; internal transcribed spacer 1, 5.8S ribosomal RNA gene, and internal transcribed spacer 2, complete sequence; and 28S ribosomal RNA gene, partial sequence  
 Sequence ID: **KU877529.1** Length: 672 Number of Matches: 1  
 Range 1: 14 to 655

| Score          | Expect | Identities   | Gaps      | Strand     | Frame |
|----------------|--------|--------------|-----------|------------|-------|
| 1173 bits(635) | 0.0()  | 640/642(99%) | 1/642(0%) | Plus/Minus |       |

Features:

```

Query 1 TCCTACCTGATTTGAGGTCAAAA-TGTCATAAATTTGTCCAAGTCAATGGACTGTTAGAA 59
Sbjct 655 TCCTACCTGATTTGAGGTCAAAAATGTCATAAATTTGTCCAAGTCAATGGACTGTTAGAA 596
Query 60 GCTGAACCCCATGTTAAAGCTGCTTCACAACCATGGCGTAGATAATTATCACACCAAAAG 119
Sbjct 595 GCTGAACCCCATGTTAAAGCTGCTTCACAACCATGGCGTAGATAATTATCACACCAAAAG 536
Query 120 CTGGTCCACAAAAGTTCCGCTAATGCATTTAAGAGGAGCCGACTTCTAGAGAAGCCCGCA 179
Sbjct 535 CTGGTCCACAAAAGTTCCGCTAATGCATTTAAGAGGAGCCGACTTCTAGAGAAGCCCGCA 476
Query 180 ATAACCTCCACATCCAAGCCAATCCAACCTGCAAAAGCTGAAAAGGTTGAGAATTTAATG 239
Sbjct 475 ATAACCTCCACATCCAAGCCAATCCAACCTGCAAAAGCTGAAAAGGTTGAGAATTTAATG 416
Query 240 ACACTCAAAACAGGCATGCTCCTCGGAATACCAAGGAGCGCAAGGTGCGTTCAAAGATTG 299
Sbjct 415 ACACTCAAAACAGGCATGCTCCTCGGAATACCAAGGAGCGCAAGGTGCGTTCAAAGATTG 356
Query 300 ATGATTCACTGAATTCTGCAATTCACATTACTTATCGCATTTCGCTGCGTTCTTCATCGA 359
Sbjct 355 ATGATTCACTGAATTCTGCAATTCACATTACTTATCGCATTTCGCTGCGTTCTTCATCGA 296
Query 360 TCGGAGAGCCAAGAGATCCGTTGTTGAAAAGTTGTATTAATTTAAAGGCATAAAGCCCATT 419
Sbjct 295 TCGGAGAGCCAAGAGATCCGTTGTTGAAAAGTTGTATTAATTTAAAGGCATAAAGCCCATT 236
Query 420 AATAACATTCTATTACATTCTTATGGGGTATAATAAAAAACATAGACTTGAAACACAAGGA 479
Sbjct 235 AATAACATTCTATTACATTCTTATGGGGTATAATAAAAAACATAGACTTGAAACACAAGGA 176
Query 480 AAGCCATGTTGCACACAGCATTCTCAAACCGAGTTTCTCGAGAGTTGTTTCAAATCT 539
Sbjct 175 AAGCCATGTTGCACACAGCATTCTCAAACCGAGTTTCTCGAGAGTTGTTTCAAATCT 116
Query 540 ACAAAAAGGTGCACAGGTGGTAAAAATGGTGTAGGCGTGCACATGCTCCAAAAAGCCAGC 599
Sbjct 115 ACAAAAAGGTGCACAGGTGGTAAAAATGGGCTAGGCGTGCACATGCTCCAAAAAGCCAGC 56
Query 600 ACAACCCAACCAAGTTTATTCAATAATGATCCTTCCGAGGT 641
Sbjct 55 ACAACCCAACCAAGTTTATTCAATAATGATCCTTCCGAGGT 14
    
```

Lepista sordida voucher TNS-F-61698 18S ribosomal RNA gene, partial sequence; internal transcribed spacer 1, 5.8S ribosomal RNA gene, and internal transcribed spacer 2, complete sequence; and 28S ribosomal RNA gene, partial sequence  
 Sequence ID: **KP293583.1** Length: 743 Number of Matches: 1  
 Range 1: 57 to 698

| Score          | Expect | Identities   | Gaps      | Strand     | Frame |
|----------------|--------|--------------|-----------|------------|-------|
| 1173 bits(635) | 0.0()  | 640/642(99%) | 1/642(0%) | Plus/Minus |       |

Features:

```

Query 1 TCCTACCTGATTTGAGGTCAAAA-TGTCATAAATTTGTCCAAGTCAATGGACTGTTAGAA 59
Sbjct 698 TCCTACCTGATTTGAGGTCAAAAATGTCATAAATTTGTCCAAGTCAATGGACTGTTAGAA 639
Query 60 GCTGAACCCCATGTTAAAGCTGCTTCACAACCATGGCGTAGATAATTATCACACCAAAAAG 119
Sbjct 638 GCTGAACCCCATGTTAAAGCTGCTTCACAACCATGGCGTAGATAATTATCACACCAAAAAG 579
Query 120 CTGGTCCACAAGGTTCCGCTAATGCATTTAAGAGGAGCCGACTTCTAGAGAAGCCCGCA 179
Sbjct 578 CTGGTCCACAAGGTTCCGCTAATGCATTTAAGAGGAGCCGACTTCTAGAGAAGCCCGCA 519
Query 180 ATAACCTCCACATCCAAGCCAATCCAACCTGCAAAAAGCTGAAAAGGTTGAGAATTTAATG 239
Sbjct 518 ATAACCTCCACATCCAAGCCAATCCAACCTGCAAAAAGCTGAAAAGGTTGAGAATTTAATG 459
Query 240 ACACTCAAAACAGGCATGCTCCTCGGAATACCAAGGAGCGCAAGGTGCGTTCAAAGATTCTG 299
Sbjct 458 ACACTCAAAACAGGCATGCTCCTCGGAATACCAAGGAGCGCAAGGTGCGTTCAAAGATTCTG 399
Query 300 ATGATTCACCTGAATTCTGCAATTCACATACTTATCGCATTTCGCTGCGTTCTTCATCGA 359
Sbjct 398 ATGATTCACCTGAATTCTGCAATTCACATACTTATCGCATTTCGCTGCGTTCTTCATCGA 339
Query 360 TGCAGAGCCAAAGAGATCCGTTGTTGAAAGTTGTATTAATTTAAAGGCATAAAGCCCATT 419
Sbjct 338 TGCAGAGCCAAAGAGATCCGTTGTTGAAAGTTGTATTAATTTAAAGGCATAAAGCCCATT 279
Query 420 AATAACATTCTATTACATTCTTATGGGGTATAATAAAAAACATAGACTTGAAACACAAGGA 479
Sbjct 278 AATAACATTCTATTACATTCTTATGGGGTATAATAAAAAACATAGACTTGAAACACAAGGA 219
Query 480 AAGCCATGTTTGACACAGCATTCTCAAACCGAGTTTCTCGAGAGTTGTTTCAAATCT 539
Sbjct 218 AAGCCATGTTTGACACAGCATTCTCAAACCGAGTTTCTCGAGAGTTGTTTCAAATCT 159
Query 540 ACAAAAAGGTGCACAGGTGGTAAAAATGGTGCTAGGCGTGCACATGCTCCAAAAAGCCAGC 599
Sbjct 158 ACAAAAAGGTGCACAGGTGGTAAAAATGGCGCTAGGCGTGCACATGCTCCAAAAAGCCAGC 99
Query 600 ACAACCCAACCAAGTTTATTCAATAATGATCCTTCCGCAGGT 641
Sbjct 98 ACAACCCAACCAAGTTTATTCAATAATGATCCTTCCGCAGGT 57
    
```

Lepista sordida genomic DNA sequence contains ITS1, 5.8S rRNA gene, ITS2, strain EGDA2  
 Sequence ID: **LN827702.1** Length: 663 Number of Matches: 1  
 Range 1: 1 to 642

| Score          | Expect | Identities   | Gaps      | Strand     | Frame |
|----------------|--------|--------------|-----------|------------|-------|
| 1173 bits(635) | 0.0()  | 640/642(99%) | 1/642(0%) | Plus/Minus |       |

Features:

```

Query 1 TCCTACCTGATTTGAGGTCAAAA-TGTCATAAATTTGTCCAAGTCAATGGACTGTTAGAA 59
Sbjct 642 TCCTACCTGATTTGAGGTCAAAAATGTCATAAATTTGTCCAAGTCAATGGACTGTTAGAA 583
Query 60 GCTGAACCCCATGTTAAAGCTGCTTCACAACCATGGCGTAGATAATTATCACACCAAAAAG 119
Sbjct 582 GCTGAACCCCATGTTAAAGCTGCTTCACAACCATGGCGTAGATAATTATCACACCAAAAAG 523
Query 120 CTGGTCCACAAGGTTCCGCTAATGCATTTAAGAGGAGCCGACTTCTAGAGAAGCCCGCA 179
Sbjct 522 CTGGTCCACAAGGTTCCGCTAATGCATTTAAGAGGAGCCGACTTCTAGAGAAGCCCGCA 463
Query 180 ATAACCTCCACATCCAAGCCAATCCAACCTGCAAAAAGCTGAAAAGGTTGAGAATTTAATG 239
Sbjct 462 ATAACCTCCACATCCAAGCCAATCCAACCTGCAAAAAGCTGAAAAGGTTGAGAATTTAATG 403
Query 240 ACACTCAAAACAGGCATGCTCCTCGGAATACCAAGGAGCGCAAGGTGCGTTCAAAGATTCTG 299
Sbjct 402 ACACTCAAAACAGGCATGCTCCTCGGAATACCAAGGAGCGCAAGGTGCGTTCAAAGATTCTG 343
Query 300 ATGATTCACCTGAATTCTGCAATTCACATACTTATCGCATTTCGCTGCGTTCTTCATCGA 359
Sbjct 342 ATGATTCACCTGAATTCTGCAATTCACATACTTATCGCATTTCGCTGCGTTCTTCATCGA 283
Query 360 TGCAGAGCCAAAGAGATCCGTTGTTGAAAGTTGTATTAATTTAAAGGCATAAAGCCCATT 419
Sbjct 282 TGCAGAGCCAAAGAGATCCGTTGTTGAAAGTTGTATTAATTTAAAGGCATAAAGCCCATT 223
Query 420 AATAACATTCTATTACATTCTTATGGGGTATAATAAAAAACATAGACTTGAAACACAAGGA 479
Sbjct 222 AATAACATTCTATTACATTCTTATGGGGTATAATAAAAAACATAGACTTGAAACACAAGGA 163
Query 480 AAGCCATGTTTGACACAGCATTCTCAAACCGAGTTTCTCGAGAGTTGTTTCAAATCT 539
Sbjct 162 AAGCCATGTTTGACACAGCATTCTCAAACCGAGTTTCTCGAGAGTTGTTTCAAATCT 103
Query 540 ACAAAAAGGTGCACAGGTGGTAAAAATGGTGCTAGGCGTGCACATGCTCCAAAAAGCCAGC 599
Sbjct 102 ACAAAAAGGTGCACAGGTGGTAAAAATGGCGCTAGGCGTGCACATGCTCCAAAAAGCCAGC 43
Query 600 ACAACCCAACCAAGTTTATTCAATAATGATCCTTCCGCAGGT 641
Sbjct 42 ACAACCCAACCAAGTTTATTCAATAATGATCCTTCCGCAGGT 1
    
```

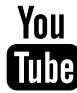[Support center Mailing list](#)[YouTube](#)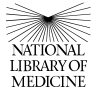

- [National Library Of Medicine](#)

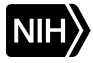

- [National Institutes Of Health](#)

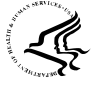

- [U.S. Department of Health & Human Services](#)

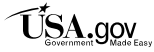

- [USA.gov](#)

## **NCBI**

[National Center for Biotechnology Information](#), [U.S. National Library of Medicine](#) 8600 Rockville Pike, Bethesda MD, 20894 USA  
[Policies and Guidelines](#) | [Contact](#)

COVID-19 is an emerging, rapidly evolving situation.

Get the latest public health information from CDC: <https://www.coronavirus.gov>.

Get the latest research from NIH: <https://www.nih.gov/coronavirus>.

Find NCBI SARS-CoV-2 literature, sequence, and clinical content: <https://www.ncbi.nlm.nih.gov/sars-cov-2/>.
