# Supplementary material for: The physiological response of Ectomycorrhizal fungus Lepista sordida to Cd and Cu stress
Source: PeerJ. 2021 Apr 16;9:e11115. doi: 10.7717/peerj.11115 (PMC8054734; doi:10.7717/peerj.11115)
Supplement: Supplemental Information 4 [file peerj-09-11115-s004.xlsx]

## Sheet: Sheet1
Cd dry weight							Cd colony diameter
0 mmol·L-1	0.1mmol·L-1	0.2mmol·L-1	0.3mmol·L-1	0.4mmol·L-1	0.5mmol·L-1		Time(d)	0.1mmol·L-1			0.2mmol·L-1			0.3mmol·L-1			0.4mmol·L-1			0.5mmol·L-1			CK
5.212	5.554	2.991	2.903	3.147	2.635		0	1.7	1.7	1.9	1.6	1.7	1.7	1.5	1.6	1.7	1.4	1.5	1.5	1.3	1.5	1.6	1.7	1.9	1.9
5.665	4.446	3.202	4.445	2.73	1.989		5	2.3	2.4	2.6	2.3	2.3	2.5	2.2	2.3	2.3	2.1	2.2	2.4	1.8	2	2.1	2.1	2.6	2.7
6.449	5.739	6.193	3.467	2.212	1.121		10	3.3	3.5	3.6	3.2	3.3	3.5	3.1	3.3	3.4	3	3.1	3.1	2.2	2.4	2.9	3.3	3.2	3.7
Cu dry weight							15	4.9	4.8	4.6	4.6	4.7	5	4.3	4.5	4.8	3.8	3.6	3.5	3	3.2	3.1	4.8	4.5	4.7
0 mmol·L-1	0.1mmol·L-1	0.2mmol·L-1	0.3mmol·L-1	0.4mmol·L-1	0.5mmol·L-1		20	6	6.2	6.3	5.7	5.9	6.2	5.1	5.5	5.3	4.1	4.5	4.4	3.5	3.8	3.8	6	6.1	6.2
5.212	4.111	3.778	3.178	3.147	2.154		25	7	6.8	6.7	5.9	6.2	6.4	5.9	6.2	6.3	4.7	4.8	5.1	4.5	4.1	3.9	7.8	7.3	7.7
5.665	4.335	3.202	3.564	2.287	1.878
6.449	4.267	3.435	2.453	2.09	3.27
Cd CAT							Cu colony diameter
0 mmol·L-1	0.1mmol·L-1	0.2mmol·L-1	0.3mmol·L-1	0.4mmol·L-1	0.5mmol·L-1		Time(d)	0.1mmol·L-1			0.2mmol·L-1			0.3mmol·L-1			0.4mmol·L-1			0.5mmol·L-1			CK
8	10	13	25	14	3		0	1.8	2	2.1	1.7	1.9	2	1.5	1.8	1.8	1.7	1.9	2	1.4	1.6	1.7	1.7	1.9	1.9
7.4	14	15	34	15	6		5	2.4	2.6	2.6	2.3	2.5	2.6	2.4	2.6	2.6	2.2	2.4	2.5	2	2.2	2.3	2.1	2.6	2.7
8.8	12	17	29	12	7		10	3.3	3.5	3.6	3.2	3.4	3.5	3.3	3.5	3.6	3.1	3.4	3.4	3	3.1	3.3	2.9	2.9	3.7
Cu CAT							15	5.6	5.8	5.9	4.9	5.2	5.6	4.7	4.9	5.2	4.8	4.9	5.3	4.2	4.7	5	4	4.1	4.2
0 mmol·L-1	0.1mmol·L-1	0.2mmol·L-1	0.3mmol·L-1	0.4mmol·L-1	0.5mmol·L-1		20	6.7	6.9	7	6.8	6.8	7.1	6.7	6.9	7.2	6.4	6.7	6.9	6.2	6.5	6.6	6	6.1	6.2
8	9	10	19	14	4		25	7	7.2	7.5	7.2	7.3	7.3	6.9	7.1	7.4	6.8	7	7.3	7	7.1	7.3	7.2	7.3	7.7
7.4	10	12	16	15	8
8.8	7	11	18	12	9
Cd POD
0 mmol·L-1	0.1mmol·L-1	0.2mmol·L-1	0.3mmol·L-1	0.4mmol·L-1	0.5mmol·L-1
40	56	87	68	42	28
45	58	96	66	45	22
44	67	85	75	54	25
Cu POD
0 mmol·L-1	0.1mmol·L-1	0.2mmol·L-1	0.3mmol·L-1	0.4mmol·L-1	0.5mmol·L-1
40	41	48	55	42	40
45	45	45	50	45	35
44	48	51	68	54	33
Cd SOD
0 mmol·L-1	0.1mmol·L-1	0.2mmol·L-1	0.3mmol·L-1	0.4mmol·L-1	0.5mmol·L-1
260	320	440	360	210	180
220	280	400	330	200	150
240	300	480	320	240	160
Cu SOD
0 mmol·L-1	0.1mmol·L-1	0.2mmol·L-1	0.3mmol·L-1	0.4mmol·L-1	0.5mmol·L-1
260	300	380	550	340	200
220	220	420	450	380	150
240	260	350	400	330	180
Cd APX
0 mmol·L-1	0.1mmol·L-1	0.2mmol·L-1	0.3mmol·L-1	0.4mmol·L-1	0.5mmol·L-1
27	44	57	35	26	12
22	42	51	33	22	10
25	38	59	30	28	16
Cu APX
0 mmol·L-1	0.1mmol·L-1	0.2mmol·L-1	0.3mmol·L-1	0.4mmol·L-1	0.5mmol·L-1
27	22	47	33	20	17
22	28	38	37	28	18
25	26	35	29	23	12
Cd sugar
0 mmol·L-1	0.1mmol·L-1	0.2mmol·L-1	0.3mmol·L-1	0.4mmol·L-1	0.5mmol·L-1
12	28	27	19	16	14
10	26	34	17	13	12
15	32	25	12	13	17
Cu sugar
0 mmol·L-1	0.1mmol·L-1	0.2mmol·L-1	0.3mmol·L-1	0.4mmol·L-1	0.5mmol·L-1
12	20	23	26	18	16
10	27	21	22	15	17
15	22	18	29	19	11
Cd protein
0 mmol·L-1	0.1mmol·L-1	0.2mmol·L-1	0.3mmol·L-1	0.4mmol·L-1	0.5mmol·L-1
25	40	47	59	41	33
22	45	55	68	34	37
20	48	58	76	36	30
Cu protein
0 mmol·L-1	0.1mmol·L-1	0.2mmol·L-1	0.3mmol·L-1	0.4mmol·L-1	0.5mmol·L-1
25	33	49	55	31	23
22	31	45	50	37	28
20	28	42	51	30	20
Cd MDA
0 mmol·L-1	0.1mmol·L-1	0.2mmol·L-1	0.3mmol·L-1	0.4mmol·L-1	0.5mmol·L-1
4.6	5.7	6.6	8.5	10.4	15.7
4.2	5.2	6.1	8.8	12.4	18.6
3.8	5.5	6	8.2	13.8	17.9
Cu MDA
0 mmol·L-1	0.1mmol·L-1	0.2mmol·L-1	0.3mmol·L-1	0.4mmol·L-1	0.5mmol·L-1
4.6	4.8	5.3	6.5	9.2	11
4.2	5	5.5	6.8	9.8	13.4
3.8	4.5	5	6.9	9.5	14.5
Cd proline
0 mmol·L-1	0.1mmol·L-1	0.2mmol·L-1	0.3mmol·L-1	0.4mmol·L-1	0.5mmol·L-1
75	160	200	240	80	85
70	120	180	260	75	70
71	130	220	200	160	80
Cu proline
0 mmol·L-1	0.1mmol·L-1	0.2mmol·L-1	0.3mmol·L-1	0.4mmol·L-1	0.5mmol·L-1
75	88	230	220	88	67
70	97	190	260	65	71
71	80	150	280	80	90
